# Supplementary material for: Digital PCR-Based Characterization of a g10evo-epsps Gene-Specific Matrix Reference Material for Its Food and Feed Detection
Source: MDPI journal article supplement (doi:10.3390/foods11131888), 2022-06-25
Supplement: s1 [file s1]

# Digital PCR-based Characterization of a g10evo-epsps Gene-Specific Matrix Reference Material for its Food and Feed Detection

Xiaoyun Chen <sup>1</sup>, Huiru Yu <sup>2</sup>, Pengfei Wang <sup>3</sup>, Cheng Peng <sup>1</sup>, Xiaofu Wang <sup>1</sup>, Xiaoli Xu <sup>1</sup>, Junfeng Xu

<sup>1,\*</sup> Jingang Liang <sup>4,\*</sup> and Liang Li <sup>5,\*</sup>

<sup>1</sup> State Key Laboratory for Managing Biotic and Chemical Threats to the Quality and Safety of Agro-products, Zhejiang Academy of Agricultural Sciences, Hangzhou 310021, China

<sup>2</sup> Zhejiang Normal University, Jinhua, 321001, China;

<sup>3</sup> Zhejiang University, Hangzhou, 310058, China;

<sup>4</sup> Development Center of Science and Technology, Ministry of Agriculture and Rural Affairs, Beijing, 100176, China;

<sup>5</sup> Institute of Quality Standard and Testing Technology for Agro-Products, Chinese Academy of Agricultural Sciences, 100081, Beijing, China;

\* Corresponding author.

*E-mail address:* lilang@caas.cn (L. Li), liangjingang@agri.gov.cn (J.G. Liang).

Table S1

Determination of seed moisture content of ZUTS-33 soybean.

| Sample          | Moisture content (%) |      |      |      |      | Mean<br>(%) | SD    | RSD<br>(%) |
|-----------------|----------------------|------|------|------|------|-------------|-------|------------|
|                 | 1                    | 2    | 3    | 4    | 5    |             |       |            |
| ZUTS-33 soybean | 7.05                 | 7.47 | 7.36 | 6.94 | 7.56 | 7.28        | 0.003 | 3.69       |

Table S2

DNA quality extracted with different isolation kit.

| Kit             | OD <sub>260</sub> /OD <sub>280</sub> | OD <sub>260</sub> /OD <sub>230</sub> | DNA concentration<br>/ng·μL <sup>-1</sup> | DNA content<br>/μg |
|-----------------|--------------------------------------|--------------------------------------|-------------------------------------------|--------------------|
| CTAB            | 1.87±0.01                            | 2.39±0.01                            | 56.9±1.0                                  | 5.69±0.10          |
| SDS             | 1.96±0.01                            | 1.15±0.01                            | 100.9±3.0                                 | 10.09±0.30         |
| Rapid isolation | 1.08±0.06                            | 1.18±0.01                            | 152.2±1.2                                 | 15.22±0.12         |

Table S3

Homozygote test result with ddPCR.

| No of the Sample | Sample              | Copies/20 $\mu$ LWell | Ratio | Result     |
|------------------|---------------------|-----------------------|-------|------------|
| 1                | <i>lectin</i>       | 4540                  | 0.96  | homozygote |
|                  | <i>g10evo-epsps</i> | 4340                  |       |            |
| 2                | <i>lectin</i>       | 4260                  | 0.98  | homozygote |
|                  | <i>g10evo-epsps</i> | 4180                  |       |            |
| 3                | <i>lectin</i>       | 3800                  | 1.01  | homozygote |
|                  | <i>g10evo-epsps</i> | 3840                  |       |            |
| 4                | <i>lectin</i>       | 4200                  | 1.01  | homozygote |
|                  | <i>g10evo-epsps</i> | 4260                  |       |            |
| 5                | <i>lectin</i>       | 4220                  | 1.02  | homozygote |
|                  | <i>g10evo-epsps</i> | 4320                  |       |            |
| 6                | <i>lectin</i>       | 4040                  | 1.00  | homozygote |
|                  | <i>g10evo-epsps</i> | 4060                  |       |            |
| 7                | <i>lectin</i>       | 4340                  | 0.93  | homozygote |
|                  | <i>g10evo-epsps</i> | 4040                  |       |            |
| 8                | <i>lectin</i>       | 3740                  | 0.97  | homozygote |
|                  | <i>g10evo-epsps</i> | 3618                  |       |            |
| 9                | <i>lectin</i>       | 3580                  | 0.96  | homozygote |
|                  | <i>g10evo-epsps</i> | 3440                  |       |            |
| 10               | <i>lectin</i>       | 3220                  | 0.96  | homozygote |
|                  | <i>g10evo-epsps</i> | 3080                  |       |            |
| 11               | <i>lectin</i>       | 4080                  | 0.94  | homozygote |
|                  | <i>g10evo-epsps</i> | 3820                  |       |            |
| 12               | <i>lectin</i>       | 4260                  | 1.05  | homozygote |
|                  | <i>g10evo-epsps</i> | 4460                  |       |            |
| 13               | <i>lectin</i>       | 3900                  | 0.90  | homozygote |
|                  | <i>g10evo-epsps</i> | 3500                  |       |            |
| 14               | <i>lectin</i>       | 4100                  | 1.00  | homozygote |
|                  | <i>g10evo-epsps</i> | 4100                  |       |            |
| 15               | <i>lectin</i>       | 4340                  | 1.00  | homozygote |
|                  | <i>g10evo-epsps</i> | 4340                  |       |            |
| 16               | <i>lectin</i>       | 4600                  | 0.91  | homozygote |
|                  | <i>g10evo-epsps</i> | 4180                  |       |            |
| 17               | <i>lectin</i>       | 3840                  | 1.01  | homozygote |
|                  | <i>g10evo-epsps</i> | 3880                  |       |            |
| 18               | <i>lectin</i>       | 3420                  | 1.09  | homozygote |
|                  | <i>g10evo-epsps</i> | 3740                  |       |            |
| 19               | <i>lectin</i>       | 3500                  | 0.91  | homozygote |
|                  | <i>g10evo-epsps</i> | 3200                  |       |            |

---

|    |                     |      |      |            |
|----|---------------------|------|------|------------|
| 20 | <i>lectin</i>       | 3600 | 0.88 | homozygote |
|    | <i>g10evo-epsps</i> | 3180 |      |            |

---

Table S4

Results of *g10evo-epsps* homogeneity test (exogenous/endogenous copy number ratio)

| <i>g10evo-epsps</i> |               |       |       |       |       |       |
|---------------------|---------------|-------|-------|-------|-------|-------|
| Vails               | Experiments   |       |       | Mean  | SD    | RSD   |
|                     | 1             | 2     | 3     |       |       |       |
| 1                   | 1.005         | 1.019 | 1.008 | 1.011 | 0.007 | 0.007 |
| 2                   | 0.946         | 0.981 | 0.969 | 0.965 | 0.018 | 0.019 |
| 3                   | 0.946         | 0.974 | 0.985 | 0.968 | 0.020 | 0.020 |
| 4                   | 0.994         | 1.016 | 0.988 | 0.999 | 0.015 | 0.015 |
| 5                   | 0.978         | 0.964 | 0.974 | 0.972 | 0.007 | 0.007 |
| 6                   | 1.026         | 0.997 | 1.002 | 1.008 | 0.015 | 0.015 |
| 7                   | 1.018         | 0.966 | 1.000 | 0.995 | 0.026 | 0.026 |
| 8                   | 0.954         | 0.955 | 0.998 | 0.969 | 0.025 | 0.026 |
| 9                   | 0.955         | 0.954 | 1.021 | 0.977 | 0.038 | 0.039 |
| 10                  | 0.994         | 0.992 | 0.963 | 0.983 | 0.017 | 0.018 |
| 11                  | 0.978         | 1.000 | 0.948 | 0.975 | 0.026 | 0.027 |
| 12                  | 0.978         | 0.960 | 0.974 | 0.971 | 0.010 | 0.010 |
|                     | Total Mean    |       |       |       | 0.983 |       |
|                     | Total SD      |       |       |       | 0.016 |       |
|                     | Total RSD (%) |       |       |       | 0.017 |       |

Table S5

Results of certified value in eight laboratories.

| Lab  | Test 1 | Test 2 | Test 3 | Test 4 | Test 5 | Test 6 | Test 7 | Test 8 | Mean  | SD   | RSD   |
|------|--------|--------|--------|--------|--------|--------|--------|--------|-------|------|-------|
| 1    | 0.98   | 0.97   | 0.96   | 0.97   | 0.98   | 0.96   | 0.97   | 0.96   | 0.970 | 0.01 | 0.99% |
| 2    | 1.00   | 1.01   | 0.99   | 1.01   | 1.02   | 0.98   | 1.01   | 0.97   | 1.000 | 0.02 | 1.72% |
| 3    | 0.99   | 1.01   | 1.02   | 1.01   | 1.02   | 1.00   | 1.02   | 1.00   | 1.009 | 0.01 | 1.07% |
| 4    | 0.95   | 0.95   | 0.97   | 0.99   | 0.97   | 0.97   | 0.96   | 0.99   | 0.968 | 0.02 | 1.73% |
| 5    | 0.96   | 1.00   | 0.97   | 0.99   | 0.93   | 0.98   | 0.98   | 0.94   | 0.968 | 0.02 | 2.47% |
| 6    | 0.96   | 1.02   | 0.99   | 1.01   | 0.96   | 0.96   | 0.93   | 1.00   | 0.977 | 0.03 | 3.11% |
| 7    | 0.95   | 0.98   | 0.92   | 0.98   | 0.96   | 0.96   | 0.95   | 0.99   | 0.960 | 0.02 | 2.26% |
| 8    | 0.96   | 0.99   | 0.95   | 0.97   | 0.97   | 0.98   | 1.00   | 0.98   | 0.974 | 0.01 | 1.41% |
| Mean |        |        |        |        |        | 0.978  |        |        |       |      |       |
| SD   |        |        |        |        |        | 0.018  |        |        |       |      |       |
| RSD  |        |        |        |        |        | 1.845% |        |        |       |      |       |

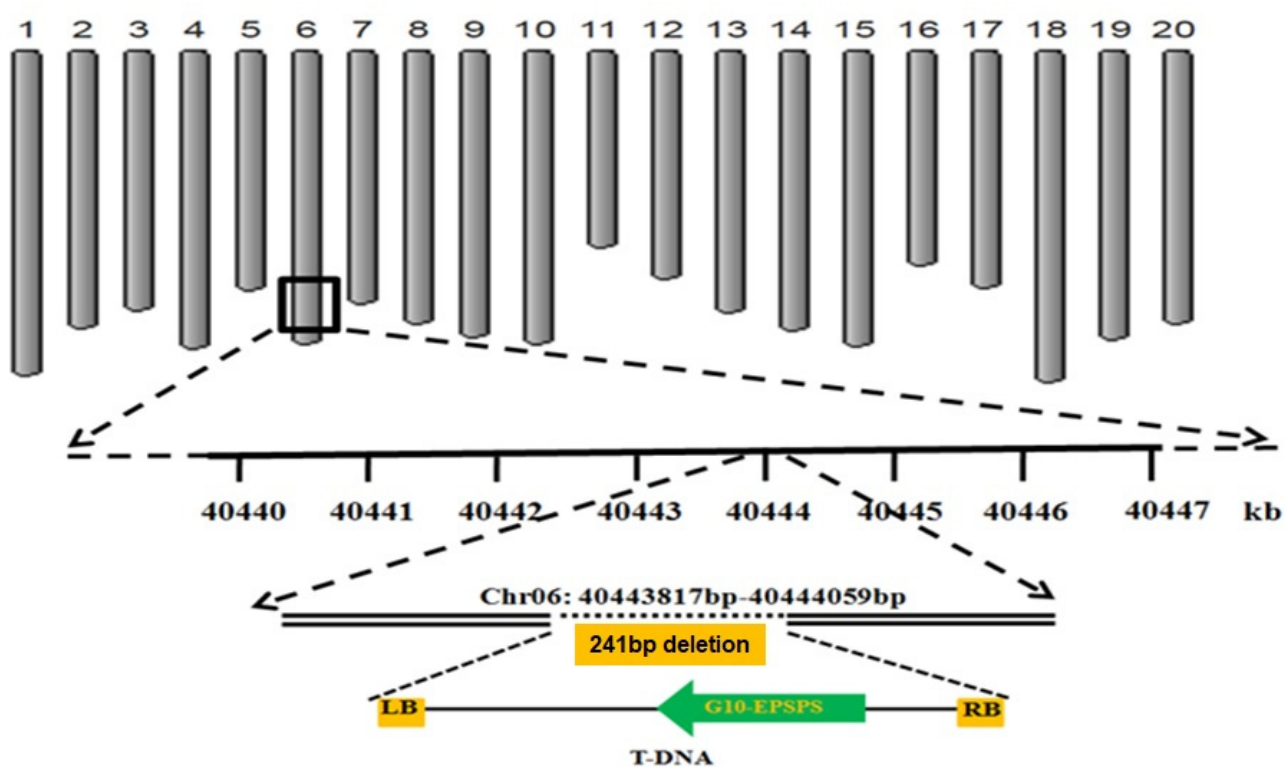

Figure S1. T-DNA structure and insertion site of the ZUTS-33 soybean



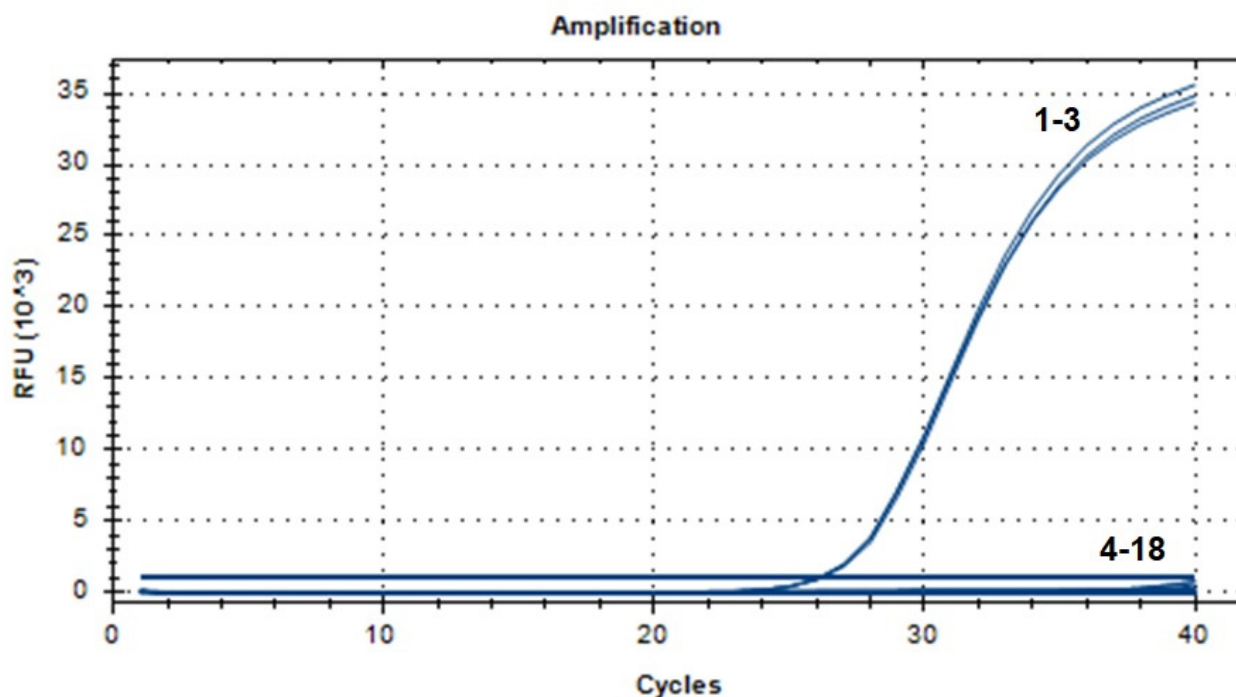

Figure S2. ZUTS-33 soybean event specific real time PCR amplification curve.

Line 1-3, three duplicates of GM soybean containing 0.5 ng; Line 4-6, three duplicates of mixed GM maize (Bt11, Bt176, MON810, MON863, GA21, NK603, T25, TC1507, MON89034, MON88017, 59122, MIR604, 3272, MON87460, MIR162, DAS40278-9, Shuangkang 12-5, IE09S034, C0030.3.5, C0010.3.7, 4114, MON87427, 5307, the content of each sample is 1%); Line 7-9, three duplicates of mixed GM soybean (GTS40-3-2, MON89788, CV127, A5547-127, A2704-12, 305423, 356043, MON88302, 73496, MON87769, MON87705, FG72, DAS68416-4, the content of each sample is 1%); Line 10-12, three duplicates of mixed GM rice (TT51-1, Kefeng 6, Kemingdao, M12, Kefeng 8, Kefeng 2, G6H1, T1C-19, the content of each sample is 1%); Line 13-15, three duplicates of mixed GM cotton (MON531, MON1445, MON15985, LLCOTTON25, MON88913, GHB614, COT102, the content of each sample is 1%); Line 16-18, three duplicates of mixed GM canola (Ms1, Ms8, RF1, RF2, RF3, T45, oxy235, Topas19/2, MON88302, 73496, the content of each sample is 1%).
